1 **Estimating the rate of index hopping on the Illumina HiSeq X platform**

2 *Tom van der Valk<sup>1</sup>, Francesco Vezzi<sup>2</sup>, Mattias Ormestad<sup>2</sup>, Love Dalén<sup>3\*</sup>, Katerina Guschanski<sup>1\*</sup>*

3 <sup>1</sup>Animal Ecology, Department of Ecology and Genetics, Evolutionary Biology Centre, Uppsala  
4 University, Norbyvägen 18D, 752 36, Uppsala, Sweden

5 <sup>2</sup>Science for Life Laboratory, Tomtebodavägen 23A, 17165 Solna, Sweden

6 <sup>3</sup>Department of Bioinformatics and Genetics, Swedish Museum of Natural History, SE-10405  
7 Stockholm, Sweden

8 \* These authors contributed equally

9 Corresponding authors: Katerina Guschanski ([katerina.guschanski@ebc.uu.se](mailto:katerina.guschanski@ebc.uu.se)), Tom van der Valk  
10 ([tom.vandervalk@ebc.uu.se](mailto:tom.vandervalk@ebc.uu.se))

11

12 **Abstract**

13 The high-throughput capacities of the Illumina sequencing platforms and possibility to label samples  
14 individually have encouraged a wide use of sample multiplexing. However, this practice results in  
15 read misassignment (usually <1%) across samples sequenced on the same lane. Alarming high rates  
16 of read misassignment of up to 10% were reported for the latest generation of Illumina sequencing  
17 machines. This potentially calls into question previously generated results and may make future use  
18 of the newest generation of platforms prohibitive. In this study we rely on barcodes, short sequences  
19 that are directly ligated to both ends of the DNA insert, which allows us to quantify the amount of  
20 index hopping. Correcting for multiple sources of noise, we identify on average only 0.470% of reads  
21 containing a hopped index. Multiplexing of samples on this platform is therefore unlikely to cause  
22 markedly different results to those obtained from older platforms.

23

24 **Keywords**

25 Read misassignment, next generation sequencing, ExAmp chemistry, multiplexing

26

27

## 28 Introduction

29 Multiplexing samples for next-generation sequencing is a common practice in many biological and  
30 medical applications [1–3]. During multiplexing, samples are individually labelled with unique  
31 identifiers (indices) that are embedded within one (single indexing) or both (dual indexing)  
32 sequencing platform-specific adapters [2,4]. The samples are subsequently pooled into a single DNA  
33 library and sequenced on the same lane, greatly reducing per sample sequencing cost. Following  
34 sequencing, computational demultiplexing, based on the sample-specific indices, allows for  
35 assignment of the sequenced reads to the respective sample of origin. However, ever since  
36 multiplexing approaches were introduced, low rates of read misassignment across samples  
37 sequenced on the same lane have been reported on all Illumina platforms [4–8]. Read  
38 misassignment is the results of reads carrying an unintended index and consequently being  
39 erroneously attributed to the wrong original sample. The reported rate of read misassignment on  
40 Illumina platforms that rely on the traditional bridge amplification for cluster generation is low (<1%)  
41 [9,10] and therefore this source of error has been mostly ignored.

42 However, on the latest generation of Illumina sequencing platforms (HiSeq X, HiSeq 4000 and  
43 NovaSeq) that rely on the exclusion amplification chemistry (ExAmp) in combination with patterned  
44 flow cells, a wide range of read misassignment rates has been reported [11–13]. Whereas one study  
45 reported no observable rate of read misassignment on neither HiSeq X and HiSeq 2500 platforms  
46 [14], other studies have documented rates of up to 10% [13]. According to Illumina’s own estimates,  
47 the rate of read misassignment on platforms with ExAmp chemistry is up to 2% [9].

48 As a consequence of conflicting results, the prevalence and severity of read misassignment on the  
49 Illumina HiSeq X platforms remain unclear. This is partly due to the difficulties to reliably identify  
50 misassigned reads in sequencing experiments, particularly if pooling similar samples types (e.g.  
51 multiple individuals from the same population that have high sequence similarity). Recently, Illumina  
52 introduced dual indices on all ExAmp sequencing platforms, allowing for the filtering of the majority

53 of reads that show signs of read misassignment. However, since indices can potentially be switched  
54 at both ends of the molecule and the number of available indices is limited, it remains difficult to  
55 obtain direct estimates of read misassignment on these platforms.

56 Some research questions require high confidence in read identity, as presence of rare sequence  
57 variants can influence biological and medical conclusions. For instance, detection of low abundance  
58 transcripts or rare mutations can influence diagnostic inferences [11,15–17]. Studies with low input  
59 DNA quantities (e.g. single cell sequencing, ancient and historical DNA) are particularly susceptible to  
60 such errors [4] . Similarly, population genomics studies frequently rely on low-coverage genomic  
61 data, and presence of shared rare alleles across several populations or species can be interpreted as  
62 evidence for gene flow or admixture [18–21].

63 Processes resulting in read misassignment, i.e. presence of reads with a switched index, are  
64 numerous. The effect of sequencing errors that can convert one index sequence into another is well  
65 known and has led to series of recommendations for designing highly distinct indices [2]. Jumping  
66 PCR during bulk amplification of library molecules that carry different indices can generate chimeric  
67 sequences and should be avoided [22–25]. Similarly, cross-contamination of indexing adapters during  
68 oligonucleotide synthesis or laboratory work can lead to reads obtaining an unintended index.  
69 Additionally, cluster misidentification due to “bleeding” of indices into neighbouring clusters have  
70 been reported on all high throughput sequencing platforms [4–8,11,26]. However, for the latest  
71 Illumina platforms with patterned flow cells and ExAmp chemistry, read misassignment has been  
72 suggested to be caused by the presence of free-floating indexing primers in the final sequencing  
73 library [9,13]. Such free-floating molecules can appear if sequencing libraries are not stored properly  
74 and become fragmented or if final sequencing libraries are not properly size selected [27]. These  
75 primers and molecules can then anneal to the pooled library molecules and get extended by DNA  
76 polymerase before the rapid exclusion amplification on the flow cell, creating a new library molecule

77 with an erroneous index. We refer to this particular process of generating misassigned reads as index  
78 hopping.

79 In this study we make use of inline barcodes, short unique seven base pair sequences ligated to both  
80 ends of the DNA fragments [28], in combination with indexed primers that are traditionally used for  
81 sample identification. The barcodes become part of the sequencing read and thus allow for accurate  
82 identification of the read origin, even in the presence of index hopping. Therefore, the amount of  
83 index hopping can be directly quantified by identifying reads with wrong barcode-index  
84 combinations. We specifically use historical museum-preserved samples that are characterized by  
85 low DNA quantity and quality (the DNA is degraded, chemically modified and shows single-strand  
86 overhangs [29,30]). Libraries constructed from such low quality samples are prone to index hopping,  
87 since generally these samples yield low coverage sequencing data and inferences are based on subtle  
88 differences between limited sets of polymorphic sites [31,32]. Therefore, small quantities of  
89 misassigned DNA fragments in aDNA studies can already cause erroneous inferences [33] and it is  
90 thus crucial to distinguish genuine sample-derived ancient DNA fragments from false signals [34].  
91 Additionally, estimates of ancient DNA preservation are often based on a small number of  
92 sequencing reads [35,36] and index hopping could therefore result in an erroneous inference about  
93 DNA preservation in a given sample. In the context of the study presented here, it is also worth  
94 noting that the small insert size in such aDNA samples allows us to obtain sequence information from  
95 both ends of the DNA fragment and thereby we can identify both barcodes with high accuracy.

96 Following sequencing on the HiSeq X platform, we identified a small fraction of reads (<1%) with a  
97 wrong barcode-index combination. After excluding several possible explanations, we conclude that  
98 index hopping happens in this system, but results in a similar rate of read misassignment as  
99 previously reported for older versions of Illumina sequencing platforms that rely on traditional bridge  
100 amplification for cluster generation. We therefore recommend using inline barcode-containing  
101 sequencing adapters, independent of the sequencing platform in studies that rely on low-coverage

102 data, require absolute certainty, aim to characterize rare variants or combine a large number of  
103 samples that exceed available index combinations.

## 104 **Methods**

### 105 **Library preparation and sequencing**

106 DNA extracts from seven historical gorilla samples were turned into sequencing libraries following  
107 the strategy outlined in [28,37] (see supplementary material). All library preparation steps except  
108 indexing PCR were performed in a dedicated ancient DNA facility to minimize contamination. Briefly,  
109 20  $\mu$ l DNA extract was used in a 50  $\mu$ l blunting reaction together with USER enzyme treatment to  
110 remove uracil bases resulting from aDNA damage [38]. DNA fragments within each sample were then  
111 ligated to a unique combination of incomplete, partially double-stranded P5- and P7-adapters, each  
112 containing a unique seven base pair sequence [37] (Table S1). We refer to these as the P5 and P7  
113 barcodes from here on. All barcode sequences were at least three nucleotides apart from each other  
114 to ensure high certainty during demultiplexing and avoid converting one barcode into another  
115 through sequencing errors [37] (Table S1). To increase the complexity of the pooled sequencing  
116 library, one sample (sample 7) was split in two fractions, each of which received a different barcode  
117 combination (Table 1).

118 Indexing PCR was performed for 10 cycles using a unique P7 indexing primer for each sample, as in  
119 [2] (Table S1). We refer to the unique sequence added during the indexing PCR as the P7 index. As  
120 with the barcodes, all index sequences differed by at least three base pairs from each other (Table  
121 S1). Indexing PCR for sample 7 was performed in a single reaction combining both fractions of this  
122 sample. Following the indexing PCR, each DNA fragment contained three unique identifiers: the P5  
123 and P7 barcodes directly ligated to the ends of the DNA fragments, and the P7 index, which becomes  
124 part of the Illumina sequencing adapter (Figure 1). Sample libraries were cleaned using MinElute spin  
125 columns, fragment length distribution and concentrations were measured on the Bioanalyzer. We  
126 then pooled all seven sample libraries in a ratio of 2:1:2:1:1:1:2 for samples 1 to 7, and performed  
127 two rounds of AMPure XP bead clean-up, using 0.5X and 1.8X bead:DNA ratio, respectively. We  
128 confirmed that indexing primers were successfully removed during clean-up by running the final

129 library on a Bioanalyzer (Figure S2). The pooled library was sequenced on three HiSeq X lanes that  
130 were part of independent runs with a 5% phiX spike-in, at the SciLife sequencing facility in Stockholm.

131

### 132 **Data processing**

133 All reads were demultiplexed based on their unique indices using Illumina's bcl2fastq (v2.17.1)  
134 software with default settings, allowing for one mismatch per index and only retaining "pass filter"  
135 reads (Illumina Inc.). All unidentified reads, i.e. reads containing indices not used in our experiment,  
136 were subjected to the same filtering steps, as described below. We removed adapter sequences  
137 using AdapterRemoval V2.1.7 with standard parameters [39]. Due to the fragmented nature of DNA  
138 in historical samples, we could subsequently merge the reads, requiring a minimal overlap of 11bp  
139 and allowing for a 10% error rate. The merging of reads allows us to obtain sequencing information  
140 for the complete DNA molecule and thus accurate identification of the barcodes on both ends of the  
141 DNA fragment (P5 and P7 barcodes, respectively, Figure 1). Unmerged reads and reads below 29 bp  
142 were removed. To increase certainty, we only retained reads with error-free P5 and P7 barcodes and  
143 an average quality score of at least 30 using prinseq V0.20.4 [40].

144

### 145 **Disentangling cross-contamination from index hopping**

146 Low rates of cross-contamination between barcodes and indexes can be expected, even if strict  
147 measure, such as clean-room facilities, are taken during library preparation [4]. This can result in  
148 reads containing a wrong index-barcode pair and could be falsely taken as evidence for index  
149 hopping. Since the inline barcodes used in this experiment are unaffected by index-hopping (Figure  
150 1), we can accurately estimate the rate of barcode cross-contamination as the fraction of reads  
151 containing a P5-P7 barcode pair that was not used during library preparation. In rare cases, barcode  
152 cross-contamination results in a read with a valid barcode pair (e.g. a barcode combination that was



153 intendedly used during library preparation) and thereby remain undetected in our estimate.  
154 However, since we used every barcode only once, the probability of such an event is several orders  
155 of magnitude lower than the fraction of reads containing an invalid barcode pair and does therefore  
156 not significantly affect any of our estimates (see supplementary material).

157 As the Illumina HiSeq X platform did not support a dual-indexing design at the time of this  
158 experiment, estimating the rate of index cross-contamination could not be based on invalid index  
159 pairs. Therefore, we relied on the fact that only seven out of the 40 indices that are routinely used in  
160 our laboratory, were implemented in this experiment (Table S3). Assuming a relative equal rate of  
161 cross-contamination between all 40 indexes, we estimated index cross-contamination as the fraction  
162 of reads containing any of the 33 indices that were not included during library preparation.

163 We then determined the raw rate of index hopping as the fraction of reads showing an index-  
164 barcode combination not used during the library preparation. We accounted for the possibility of  
165 barcode and index cross-contamination resulting in the same barcode-index combination by  
166 subtracting the contamination estimates obtained above from the raw value of index hopping. All  
167 statistical analyses were performed in R 2.15.3 [41] (see supplementary material).

168

169 **Results**

170 Our sequencing libraries were made from degraded historical samples and thus contained a large  
171 proportion of short DNA fragments (Figure S3A). Therefore, the majority of reads could be  
172 confidently merged for all three sequencing runs (95.3% SE  $\pm$  1.0%). After all filtering steps (see  
173 Methods), the final dataset contained 89.3% SE  $\pm$  1.9% of the original sequence reads.

174

175 **Barcode and index cross-contamination**

176 We estimate the levels of barcode cross-contamination at 0.0276% SE  $\pm$  0.0026 across all three runs  
177 (Table 1, Table S2, Figure S1), with different rates observed between samples (global chi-square test,  
178  $P < 10^{-15}$ ). The high observed level of incorrect barcode-pairings in sample seven, can be explained by  
179 formation of chimeric reads during pooled amplification of the two different fractions of this sample  
180 that were barcoded separately (see supplementary material). Assuming that adapter ligation of  
181 barcodes is unbiased with respect to the barcode sequence [37], this low percentage of cross-  
182 contamination will lead to a neglectable fraction of reads ( $1.09 \cdot 10^{-8}\%$ , see supplementary material)  
183 with barcode pair that wrongly appear as having undergone index hopping.

184 The rate of index cross-contamination was estimated at 0.124% SE  $\pm$  0.0023 (Table S3), by  
185 quantifying the fraction of reads containing indices that were not intentionally used in our  
186 experiment (see Methods, Table S3).

187

188 **Index hopping**

189 Index hopping will not affect the barcodes that are directly ligated to the DNA fragments. Therefore,  
190 it can be readily distinguished from barcode cross-contamination by identifying reads containing a  
191 combination between an index and a barcode pair that was not used during the library preparation.  
192 Across all three sequencing runs, we detected a low proportion of such reads (mean=0.594%, SE  $\pm$

193 0.0434%, Table 1). As previously estimated  $\sim 0.124\%$  of these reads are a result of index and barcode  
194 cross-contamination. Therefore, the estimated rate of index hopping in our experiment across all  
195 three sequencing runs is  $\sim 0.470\% \text{ SE} \pm 0.044$  ( $0.594\%$  minus  $0.124\%$ ). The proportion of hopped  
196 reads differed significantly by sample (chi-square test,  $P < 10^{-15}$ ) and was positively correlated with the  
197 number of sequenced reads per sample (Pearson's  $r = 0.96$ ,  $P = 0.0005$ ). This suggests that in  
198 multiplexed sequencing runs the samples with higher number of sequenced reads will serve as the  
199 dominant source of hopped reads (Figure 2). Even though the overall rate of index hopping is low,  
200 samples with proportionally few sequenced reads are thus considerably more affected by index  
201 hopping. In our experiments, this resulted in  $2.49\% \text{ SE} \pm 0.29\%$  of index hopped reads in the sample  
202 with the lowest number of sequenced reads (Table 1, Table S4, Figure 2).

203 In addition, the rate of index hopping differed significantly by read length and GC content. Reads  
204 shorter than 90 bp and reads with GC content above 40% showed significantly higher proportion of  
205 hopped reads than expected under a random distribution (chi-square test, both  $P < 10^{-15}$ , Figure S3).

206

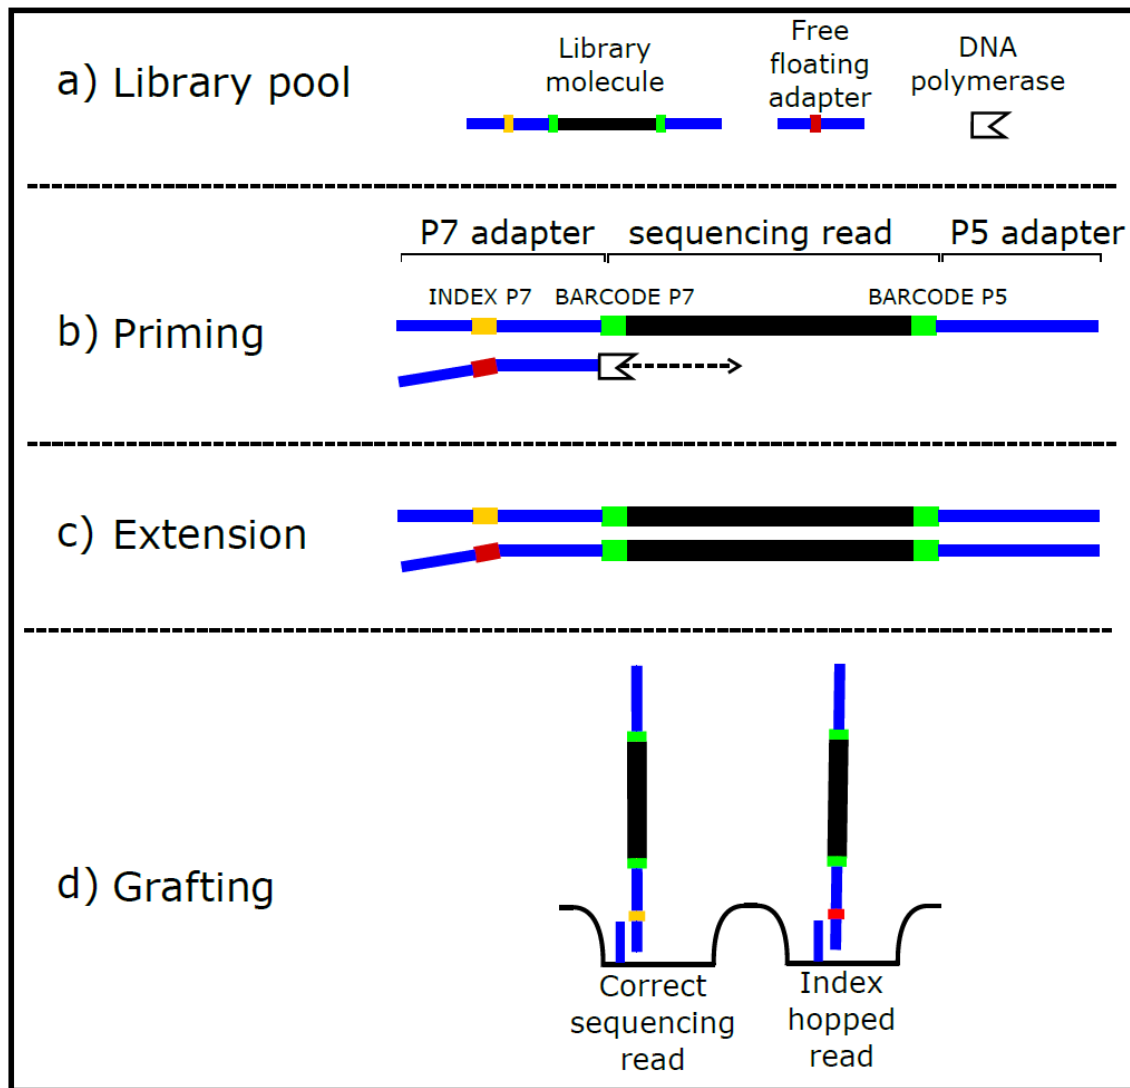

207

208 *Figure 1: Outcome of index hopping. A) The library pool, containing barcoded and indexed library*  
209 *molecules and free-floating indexing primers, is mixed with ExAmp reagents before loading on the*  
210 *patterned flow cell. B) Free-floating adapters anneal to the adapter sequence of a library molecule*  
211 *and C) the library molecule subsequently gets extended by DNA polymerase forming a new library*  
212 *molecule containing a wrong index. D) The library molecules are denatured, separating the strands,*  
213 *and each library molecule is allowed to graft onto a nanowell on the patterned flow cell.*

214

215

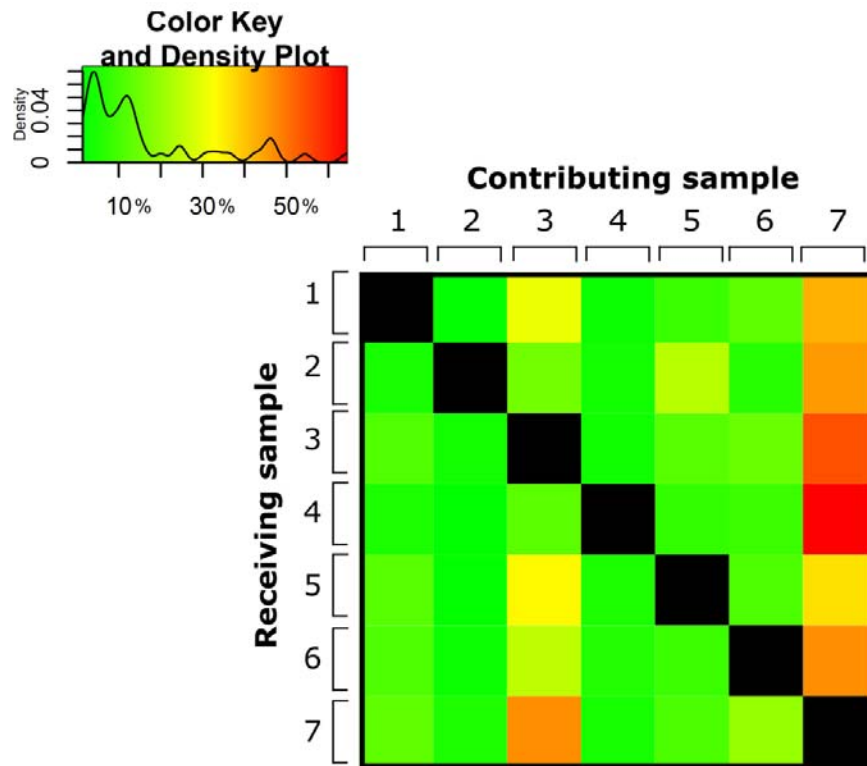

216

217

218 *Figure 2, Proportion of hopped reads per sample out of all hopped reads. Samples in the top row*

219 *contribute hopped reads, whereas samples on the left receive hopped reads. Samples with high*

220 *number of reads (e.g. 3 and 7) are also the main contributors of hopped reads.*

221

222 *Table 1: Sequencing statistics and estimates of contamination and index hopping.*

| Sample                                         | Used P5 barcode | Used P7 barcode | Original reads (Millions) |       |        | Reads after quality filtering (Millions) |       |        | Reads with wrong barcode pairs (cross-contamination) |        |        | Reads with wrong index-barcode combination |        |         | Cross contaminated reads (%) |        |        | Index hopped reads (%) |        |        |
|------------------------------------------------|-----------------|-----------------|---------------------------|-------|--------|------------------------------------------|-------|--------|------------------------------------------------------|--------|--------|--------------------------------------------|--------|---------|------------------------------|--------|--------|------------------------|--------|--------|
|                                                |                 |                 | Run 1                     | Run 2 | Run 3  | Run 1                                    | Run 2 | Run 3  | Run 1                                                | Run 2  | Run 3  | Run 1                                      | Run 2  | Run 3   | Run 1                        | Run 2  | Run 3  | Run 1                  | Run 2  | Run 3  |
| 1                                              | 3               | 3               | 40.63                     | 14.74 | 53.95  | 34.49                                    | 13.01 | 50.43  | 2042                                                 | 971    | 3580   | 158905                                     | 87697  | 280808  | 0.0059                       | 0.0075 | 0.0071 | 0.4587                 | 0.6693 | 0.5538 |
| 2                                              | 4               | 4               | 11.28                     | 4.83  | 14.16  | 9.80                                     | 4.37  | 13.51  | 1447                                                 | 644    | 1398   | 130125                                     | 77502  | 186512  | 0.0148                       | 0.0147 | 0.0103 | 1.3100                 | 1.7435 | 1.3622 |
| 3                                              | 5               | 5               | 127.21                    | 44.98 | 157.84 | 104.79                                   | 40.40 | 147.48 | 12939                                                | 4184   | 6937   | 265347                                     | 163502 | 572787  | 0.0123                       | 0.0104 | 0.0047 | 0.2526                 | 0.4031 | 0.3869 |
| 4                                              | 6               | 6               | 13.80                     | 4.53  | 18.76  | 11.31                                    | 3.88  | 17.05  | 1831                                                 | 865    | 2314   | 262764                                     | 127417 | 349123  | 0.0162                       | 0.0223 | 0.0136 | 2.2700                 | 3.1824 | 2.0061 |
| 5                                              | 7               | 7               | 22.69                     | 10.27 | 34.67  | 20.00                                    | 9.13  | 32.23  | 7555                                                 | 3676   | 9563   | 166238                                     | 86408  | 308164  | 0.0378                       | 0.0402 | 0.0297 | 0.8245                 | 0.9374 | 0.9472 |
| 6                                              | 8               | 8               | 30.46                     | 13.57 | 39.58  | 27.56                                    | 12.65 | 38.09  | 2034                                                 | 1245   | 2449   | 78427                                      | 39006  | 161356  | 0.0074                       | 0.0098 | 0.0064 | 0.2838                 | 0.3073 | 0.4219 |
| 7                                              | 9               | 9               | 125.50                    | 49.63 | 142.72 | 108.26                                   | 44.33 | 130.73 | 63867                                                | 26727  | 62677  | 481435                                     | 256394 | 881862  | 0.0590                       | 0.0603 | 0.0479 | 0.4427                 | 0.5751 | 0.6700 |
| Unidentified                                   | 14              | 14              | 21.55                     | 9.43  | 33.00  | 14.44                                    | 7.19  | 18.14  | 7860                                                 | 4145   | 5609   | -                                          | -      | -       | 0.0544                       | 0.0576 | 0.0309 | -                      | -      | -      |
| <b>Total</b>                                   | -               | -               | 393                       | 152   | 495    | 331                                      | 135   | 448    | 99575                                                | 42457  | 94527  | 1543241                                    | 837926 | 2740612 | -                            | -      | -      | -                      | -      | -      |
| <b>Average barcode cross-contamination (%)</b> | -               | -               | -                         | -     | -      | -                                        | -     | -      | 0.0301                                               | 0.0315 | 0.0211 | -                                          | -      | -       | -                            | -      | -      | -                      | -      | -      |
| <b>Average index hopping (%)</b>               | -               | -               | -                         | -     | -      | -                                        | -     | -      | -                                                    | -      | -      | 0.488                                      | 0.656  | 0.638   | -                            | -      | -      | -                      | -      | -      |

223  
224

## 225 Discussion

226 We show that index hopping occurs on the Illumina HiSeq X platform, but its rate is low in our study  
227 (0.470% SE  $\pm$  0.044). Although multiple sources of error such as jumping PCR, barcode and index  
228 cross-contamination, sequencing errors, and index hopping can result in read misassignment we  
229 could systematically address each of them through a careful experimental design. Jumping PCR can  
230 be eliminated as explanation for wrong index-barcode combinations, as we avoided amplification of  
231 pooled libraries from different samples. We further show that the rate of barcode and index cross-  
232 contamination is very low (0.027% SE  $\pm$  0.0026 and 0.124%  $\pm$  0.0023, respectively) and therefore not  
233 the primary cause of the observed proportion of reads with wrong index-barcode pairs.

234 Read misassignment is not a novel phenomenon for the Illumina sequencing platforms. Reported  
235 error rates range from 0.1% to 0.582% for HiSeq 2500 [4,6,42] and from 0.06% to 0.51% for the  
236 MiSeq platforms [5,7,8]. It is therefore noteworthy that the fraction of hopped reads as estimated in  
237 our study (0.470%) is similar to that reported for other platforms. However, it markedly differs from  
238 previous estimates for the Illumina HiSeq platforms with ExAmp chemistry [12–14]. Since the  
239 sequencing chemistry of the Illumina NovaSeq platform is identical to that used for the HiSeq X, this  
240 platform is likely to be affected at a similar rate as reported here.

241 We propose that the low rate of index hopping achieved in our experiment is the result of rigorous  
242 removal of free-floating adapters through size selection and library clean-up (Figure S2). Therefore,  
243 as previously suggested, strict library clean-up, such as those performed in this study, should be  
244 performed in multiplexed sequencing studies [27].

245 A novel observation in our study is that the number of hopped reads within a sample is proportional  
246 to the total number of reads contributed by the sample to the pooled sequencing library.  
247 Importantly, pooling samples in different quantities leads to a greater proportion of hopped reads  
248 into samples with fewer sequenced reads. In this study, libraries with the lowest number of  
249 sequenced reads (e.g. sample 2 and 4) displayed up to 3.2% of misassigned reads (Table 1), an order

250 of magnitude higher than the average rate within a lane. The effect of this skewed rate of index  
251 hopping becomes even more severe if the endogenous content is markedly different between  
252 samples, as is often observed in aDNA studies [43–45]. Since the endogenous content is usually not  
253 known beforehand, pooling samples in equal quantities can lead to large differences in the number of  
254 endogenous reads between samples. In these cases, the proportion of false assigned endogenous  
255 reads can reach rates above 10% (Figure S4). Therefore, variation in sample DNA quantities should be  
256 minimized when sequencing a sample pool on the same lane. Ideally, pre-pooling qPCR quantification  
257 of sample DNA should be performed to balance the sequencing libraries. Additionally, when samples  
258 are sequenced at high depth (i.e. across multiple lanes/flowcells), re-pooling should be considered  
259 after the first sequencing run if high variation in (endogenous) read numbers is observed. This is  
260 especially relevant for the NovaSeq platform, the most powerful sequencing platform currently  
261 available, since it has been specifically designed for the multiplexing of up to hundreds of samples.  
262 Additionally, we detected a higher rate of index hopping among the shorter reads and small  
263 differences in the fraction of index-hopped reads related to read GC-content. This suggests that the  
264 annealing of free floating adapters present in the sequencing libraries does not occur randomly. The  
265 underlying mechanisms are not yet well understood but could be related to differences in the DNA  
266 denaturation temperatures between DNA fragments of different size. Due to the lower denaturation  
267 temperature, short fragments might be occurring at a higher rate in single stranded conformation  
268 and are thereby more accessible to free floating index primers.

269 The recent addition of dual-indexing on the HiSeq X platform allows for the mitigation of the majority  
270 of errors resulting from index hopping. Nonetheless, in cases where low coverage data is generated  
271 or absolutely certainty is required, even a low remaining rate of misassigned reads might represent a  
272 major problem. Our study outlines a strategy for identification, quantification and removal of  
273 misassigned reads that result from index hopping or other sources of error. We therefore  
274 recommend the use of short barcoded in-line adapters when preparing pooled libraries for next



275 generation sequencing, independently of sequencing platform, if a very high degree of certainty is  
276 required.

277 **Author contributions:** TvdV and MO performed the wetlab experiments. TvdV and FV performed  
278 computational data-analysis. TvdV and KG established the experimental design. TvdV, LD and KG  
279 conceived the study, interpreted the results and wrote the manuscript (with contribution of all co-  
280 authors).

281

282 **Acknowledgments:**

283 We acknowledge the support from the Science for Life Laboratory, the Knut and Alice Wallenberg  
284 Foundation, the National Genomics Infrastructure funded by the Swedish Research Council, and  
285 Uppsala Multidisciplinary Center for Advanced Computational Science for assistance with massively  
286 parallel sequencing and access to the UPPMAX computational infrastructure. We thank Illumina for  
287 providing sequencing reagents. Illumina had no role in study design, data collection and analysis,  
288 decision to publish or preparation of the manuscript.

289 **Data access:** Raw sequencing data is available at the European nucleotide archive under accession  
290 number XXXX

291 **Funding sources:** This project was supported by FORMAS grant 2015-676 to LD, FORMAS grant 2016-  
292 00835 to KG and the Jan Löfqvist Endowments of the Royal Physiographic Society of Lund to KG.

293 **Conflicts of Interest**

294 The authors declare no conflicts of interests.

295

296 **References**

- 297 1. Craig, D.W., Pearson, J. V, Szeling, S., Sekar, A., Redman, M., Corneveaux, J.J., Pawlowski,  
298 T.L., Laub, T., Nunn, G., Stephan, D.A., *et al.* (2008). Identification of genetic variants using  
299 bar-coded multiplexed sequencing. *Nat. Methods* 5, 887–893.
- 300 2. Meyer, M., and Kircher, M. (2010). Illumina sequencing library preparation for highly  
301 multiplexed target capture and sequencing. *Cold Spring Harb. Protoc.* 5, pdb.prot5448.
- 302 3. Smith, A.M., Heisler, L.E., St.Onge, R.P., Farias-Hesson, E., Wallace, I.M., Bodeau, J., Harris,  
303 A.N., Perry, K.M., Giaever, G., Pourmand, N., *et al.* (2010). Highly-multiplexed barcode  
304 sequencing: an efficient method for parallel analysis of pooled samples. *Nucleic Acids Res.* 38,  
305 e142–e142.
- 306 4. Kircher, M., Sawyer, S., and Meyer, M. (2012). Double indexing overcomes inaccuracies in  
307 multiplex sequencing on the Illumina platform. *Nucleic Acids Res.* 40, e3.
- 308 5. Renaud, G., Stenzel, U., Maricic, T., Wiebe, V., and Kelso, J. (2015). deML: robust  
309 demultiplexing of Illumina sequences using a likelihood-based approach. *Bioinformatics* 31,  
310 770–2.
- 311 6. Wright, E.S., and Vetsigian, K.H. (2016). Quality filtering of Illumina index reads mitigates  
312 sample cross-talk. *BMC Genomics* 17, 876.
- 313 7. Nelson, M.C., Morrison, H.G., Benjamino, J., Grim, S.L., and Graf, J. (2014). Analysis,  
314 Optimization and Verification of Illumina-Generated 16S rRNA Gene Amplicon Surveys. *PLoS*  
315 *One* 9, e94249.
- 316 8. D’Amore, R., Ijaz, U.Z., Schirmer, M., Kenny, J.G., Gregory, R., Darby, A.C., Shakya, M., Podar,  
317 M., Quince, C., and Hall, N. (2016). A comprehensive benchmarking study of protocols and  
318 sequencing platforms for 16S rRNA community profiling. *BMC Genomics* 17, 55.

- 319 9. Illumina Inc. (2017). Effects of Index Misassignment on Multiplexing and Downstream  
320 Analysis.
- 321 10. Bentley, D.R., Balasubramanian, S., Swerdlow, H.P., Smith, G.P., Milton, J., Brown, C.G., Hall,  
322 K.P., Evers, D.J., Barnes, C.L., Bignell, H.R., *et al.* (2008). Accurate whole human genome  
323 sequencing using reversible terminator chemistry. - Supplement. *Nature* 456, 53–9.
- 324 11. Vodak, D., Lorenz, S., Nakken, S., Aasheim, L.B., Holte, H., Bai, B., Myklebost, O., Meza-  
325 Zepeda, L.A., and Hovig, E. (2017). Sample-Index Misassignment Impacts Tumor Exome  
326 Sequencing. *bioRxiv*.
- 327 12. Griffiths, J.A., Lun, A.T.L., Richard, A.C., Bach, K., and Marioni, J.C. (2017). Detection and  
328 removal of barcode swapping in single-cell RNA-seq data. *bioRxiv*.
- 329 13. Sinha, R., Stanley, G., Gulati, G.S., Ezran, C., Travaglini, K.J., Wei, E., Chan, C.K.F., Nabhan, A.N.,  
330 Su, T., Morganti, R.M., *et al.* (2017). Index Switching Causes “Spreading-Of-Signal” Among  
331 Multiplexed Samples In Illumina HiSeq 4000 DNA Sequencing. *bioRxiv*.
- 332 14. Owens, G.L., Todesco, M., Drummond, E.B.M., Yeaman, S., and Rieseberg, L.H. (2017). A Novel  
333 Post Hoc Method For Detecting Index Switching Finds No Evidence For Increased Switching On  
334 The Illumina HiSeq X. *bioRxiv*.
- 335 15. Schmitt, M.W., Kennedy, S.R., Salk, J.J., Fox, E.J., Hiatt, J.B., and Loeb, L.A. (2012). Detection of  
336 ultra-rare mutations by next-generation sequencing. *Proc. Natl. Acad. Sci. U. S. A.* 109, 14508–  
337 13.
- 338 16. Flaherty, P., Natsoulis, G., Muralidharan, O., Winters, M., Buenrostro, J., Bell, J., Brown, S.,  
339 Holodniy, M., Zhang, N., and Ji, H.P. (2012). Ultrasensitive detection of rare mutations using  
340 next-generation targeted resequencing. *Nucleic Acids Res.* 40, e2–e2.
- 341 17. Trapnell, C., Hendrickson, D.G., Sauvageau, M., Goff, L., Rinn, J.L., and Pachter, L. (2013).  
342 Differential analysis of gene regulation at transcript resolution with RNA-seq. *Nat. Biotechnol.*

- 343 31, 46–53.
- 344 18. Green, R.E., Krause, J., Briggs, A.W., Maricic, T., Stenzel, U., Kircher, M., Patterson, N., Li, H.,  
345 Zhai, W.W., Fritz, M.H.Y., *et al.* (2010). A Draft Sequence of the Neandertal Genome. *Science*  
346 328, 710–722.
- 347 19. Nielsen, R., Korneliussen, T., Albrechtsen, A., Li, Y., and Wang, J. (2012). SNP calling, genotype  
348 calling, and sample allele frequency estimation from new-generation sequencing data. *PLoS*  
349 *One* 7, e37558.
- 350 20. Fumagalli, M., Vieira, F.G., Korneliussen, T.S., Linderoth, T., Huerta-Sánchez, E., Albrechtsen,  
351 A., and Nielsen, R. (2013). Quantifying population genetic differentiation from next-  
352 generation sequencing data. *Genetics* 195, 979–992.
- 353 21. Therkildsen, N.O., and Palumbi, S.R. (2017). Practical low-coverage genomewide sequencing  
354 of hundreds of individually barcoded samples for population and evolutionary genomics in  
355 nonmodel species. *Mol. Ecol. Resour.* 17, 194–208.
- 356 22. Meyerhans, A., Vartanian, J.P., and Wain-Hobson, S. (1990). DNA recombination during PCR.  
357 *Nucleic Acids Res.* 18, 1687–1691.
- 358 23. Odelberg, S.J., Weiss, R.B., Hata, A., and White, R. (1995). Template-switching during DNA  
359 synthesis by *Thermus aquaticus* DNA polymerase I. *Nucleic Acids Res.* 23, 2049–57.
- 360 24. Carlsen, T., Aas, A.B., Lindner, D., Vrålstad, T., Schumacher, T., and Kausrud, H. (2012). Don't  
361 make a mista(g)ke: Is tag switching an overlooked source of error in amplicon pyrosequencing  
362 studies? *Fungal Ecol.* 5, 747–749.
- 363 25. Esling, P., Lejzerowicz, F., and Pawlowski, J. (2015). Accurate multiplexing and filtering for  
364 high-throughput amplicon-sequencing. *Nucleic Acids Res.* 43, 2513–2524.
- 365 26. Mitra, A., Skrzypczak, M., Ginalski, K., and Rowicka, M. (2015). Strategies for achieving high

- 366 sequencing accuracy for low diversity samples and avoiding sample bleeding using Illumina  
367 platform. *PLoS One* 10, e0120520.
- 368 27. Illumina Inc. (2017). Effects of Index Misassignment on Multiplexing and Downstream  
369 Analysis.
- 370 28. Rohland, N., and Reich, D. (2012). Cost-effective, high-throughput DNA sequencing libraries  
371 for multiplexed target capture. *Genome Res.* 22, 939–946.
- 372 29. Mulligan, C.J. (2005). Isolation and Analysis of DNA from Archaeological, Clinical, and Natural  
373 History Specimens. *Methods Enzymol.* 395, 87–103.
- 374 30. Sawyer, S., Krause, J., Guschanski, K., Savolainen, V., and Paabo, S. (2012). Temporal patterns  
375 of nucleotide misincorporations and DNA fragmentation in ancient DNA. *PLoS One* 7, e34131.
- 376 31. Allentoft, M.E., Sikora, M., Sjögren, K.-G., Rasmussen, S., Rasmussen, M., Stenderup, J.,  
377 Damgaard, P.B., Schroeder, H., Ahlström, T., Vinner, L., *et al.* (2015). Population genomics of  
378 Bronze Age Eurasia. *Nature* 522, 167–172.
- 379 32. Haak, W., Lazaridis, I., Patterson, N., Rohland, N., Mallick, S., Llamas, B., Brandt, G.,  
380 Nordenfelt, S., Harney, E., Stewardson, K., *et al.* (2015). Massive migration from the steppe  
381 was a source for Indo-European languages in Europe. *Nature* 522, 207–211.
- 382 33. Wall, J.D., and Kim, S.K. (2007). Inconsistencies in Neanderthal Genomic DNA Sequences. *PLoS*  
383 *Genet.* 3, e175.
- 384 34. Skoglund, P., Northoff, B.H., Shunkov, M. V, Derevianko, A.P., Pääbo, S., Krause, J., Jakobsson,  
385 M., and Klein, R.G. Separating endogenous ancient DNA from modern day contamination in a  
386 Siberian Neandertal.
- 387 35. Slon, V., Hopfe, C., Weiß, C.L., Mafessoni, F., de la Rasilla, M., Lalueza-Fox, C., Rosas, A.,  
388 Soressi, M., Knul, M. V, Miller, R., *et al.* (2017). Neandertal and Denisovan DNA from

- 389 Pleistocene sediments. *Science* 356, 605–608.
- 390 36. Pečnerová, P., Díez-del-Molino, D., Dussex, N., Feuerborn, T., von Seth, J., van der Plicht, J.,  
391 Nikolskiy, P., Tikhonov, A., Vartanyan, S., and Dalén, L. (2017). Genome-Based Sexing Provides  
392 Clues about Behavior and Social Structure in the Woolly Mammoth. *Curr. Biol.* 27, 3505–  
393 3510.e3.
- 394 37. Rohland, N., Harney, E., Mallick, S., Nordenfelt, S., and Reich, D. (2015). Partial uracil-DNA-  
395 glycosylase treatment for screening of ancient DNA. *Philos. Trans. R. Soc. Lond. B. Biol. Sci.*  
396 370, 20130624.
- 397 38. Briggs, A.W., Stenzel, U., Meyer, M., Krause, J., Kircher, M., and Pääbo, S. (2010). Removal of  
398 deaminated cytosines and detection of in vivo methylation in ancient DNA. *Nucleic Acids Res.*  
399 38, e87.
- 400 39. Schubert, M., Lindgreen, S., and Orlando, L. (2016). AdapterRemoval v2: rapid adapter  
401 trimming, identification, and read merging. *BMC Res. Notes* 9, 88.
- 402 40. Schmieder, R., and Edwards, R. (2011). Quality control and preprocessing of metagenomic  
403 datasets. *Bioinformatics* 27, 863–864.
- 404 41. Team R Core (2016). R: A language and environment for statistical computing. R Foundation  
405 for Statistical Computing, Vienna, Austria. ISBN 3-900051-07-0, URL [http://www.R-](http://www.R-project.org/)  
406 [project.org/](http://www.R-project.org/).
- 407 42. Wright, E.S., and Vetsigian, K.H. (2016). Inhibitory interactions promote frequent bistability  
408 among competing bacteria. *Nat. Commun.* 7, 11274.
- 409 43. Damgaard, P.B., Margaryan, A., Schroeder, H., Orlando, L., Willerslev, E., and Allentoft, M.E.  
410 (2015). Improving access to endogenous DNA in ancient bones and teeth. *Sci. Rep.* 5, 11184.
- 411 44. Pinhasi, R., Fernandes, D., Sirak, K., Novak, M., Connell, S., Alpaslan-Roodenberg, S., Gerritsen,

- 412 F., Moiseyev, V., Gromov, A., Raczky, P., *et al.* (2015). Optimal ancient DNA yields from the  
413 inner ear part of the human petrous bone. *PLoS One* *10*, e0129102.
- 414 45. van der Valk, T., Lona Durazo, F., Dalén, L., and Guschanski, K. (2017). Whole mitochondrial  
415 genome capture from faecal samples and museum-preserved specimens. *Mol. Ecol. Resour.*  
416 *17*, e111–e121.
- 417



418 **Supplementary materials for:**

419 **Estimating the rate of index hopping on the Illumina HiSeq X platform**

420 *Tom van der Valk, Francesco Vezzi, Mattias Ormestad, Love Dalén, Katerina Guschanski*

421

422 **This PDF includes:**

|     |                                                   |       |
|-----|---------------------------------------------------|-------|
| 423 | Material and methods: Library preparation         | 2 – 4 |
| 424 | Material and methods: Data processing             | 5     |
| 425 | Material and methods: Barcode cross-contamination | 6     |
| 426 | Material and methods: References                  | 7     |
| 427 | Figure S1                                         | 8     |
| 428 | Figure S2                                         | 9     |
| 429 | Figure S3                                         | 10    |
| 430 | Figure S4                                         | 11    |

431

432 **Methods**

433 **Library preparation and sequencing**

434 DNA extracts from seven historical eastern gorilla samples that previously yielded good sequencing  
435 results on the Illumina HiSeq 2500 platform and showed high endogenous content were turned into  
436 sequencing libraries following the strategy outlined in (1,2) as detailed below. All library preparation  
437 steps except indexing PCR were performed in a dedicated ancient DNA facility to minimize  
438 contamination.

439 **1 USER-TREATMENT AND BLUNT-ENDING**

440 We used 20  $\mu$ l DNA extract in a 50  $\mu$ l blunting reaction together with USER enzyme treatment to  
441 remove uracil bases resulting from aDNA damage (3) as follows:

|                           | <i>Volume per sample</i>    | <i>Final concentration</i> |
|---------------------------|-----------------------------|----------------------------|
| H <sub>2</sub> O          | 9.89 $\mu$ l                |                            |
| Tango Buffer (10x)        | 4 $\mu$ l                   | 1x                         |
| dNTPs (25 mM each)        | 0.16 $\mu$ l                | 100 $\mu$ M each           |
| ATP (100 mM)              | 0.4 $\mu$ l                 | 1 mM                       |
| T4 PNK (10 U/ $\mu$ L)    | 2 $\mu$ l                   | 0.5 U/ $\mu$ l             |
| USER enzyme (1U/ $\mu$ L) | 2.75 $\mu$ l                | 0.06U/ $\mu$ l             |
| T4 DNA Pol (5 U/ $\mu$ L) | 0.8 $\mu$ l                 | 0.1 U/ $\mu$ l             |
| DNA                       | 20 $\mu$ l                  |                            |
| <b>TOTAL VOLUME</b>       | <b>40 <math>\mu</math>l</b> |                            |

442

443 Samples were incubated for 3 h at 37°C, followed by the addition of 1  $\mu$ l T4 DNA polymerase (Thermo  
444 Scientific) and incubation at 25°C for 15 min and 12°C for 5 min. We then MinElute purified the  
445 reaction according to the manufacturer's protocol and eluted in 22  $\mu$ l of EB buffer. DNA fragments  
446 within each sample were then ligated to a unique combination of incomplete, partially double-  
447 stranded P5- and P7-adapters (10  $\mu$ M each), each containing a unique seven base pair sequence as  
448 follows:

449

450 **2) ADAPTER LIGATION AND BARCODING**

451

|                            | <i>Volume per sample</i> | <i>Final concentration</i> |
|----------------------------|--------------------------|----------------------------|
| H <sub>2</sub> O           | 10 µl                    |                            |
| T4 DNA ligase Buffer (10x) | 4 µl                     | 1x                         |
| PEG-4000 (50%)             | 4 µl                     | 5%                         |
| Barcoded adapters (10 µM)  | 1 µl each                | 1.25 µM                    |
| T4 DNA ligase (5 U/ul)     | 1 µl                     | 0.125 U/µl                 |
| Blunt-ended DNA            | 20 µl                    |                            |
| TOTAL VOLUME               | 40 µl                    |                            |

452 \*1 µl of the barcode P5.F-mix (10 µM) and 1 µL of the barcode P7.F-mix (10 µM).

453 Samples were incubated for 30 minutes at room temperature. We refer to the 7 basepair adapters as  
454 the P5 and P7 barcodes from here on. All barcode sequences were at least three nucleotides apart  
455 from each other to ensure high certainty during demultiplexing and avoid converting one barcode  
456 into another through sequencing errors (2, Table S1). To increase the complexity of the pooled  
457 sequencing library, one sample received two different barcode combinations (Table 1). Following  
458 adapter ligation reactions were MinElute purified according to the manufacturer's protocol and  
459 eluted in 22 µl of EB buffer. We then performed adapter fill-in as follows:

460

461 **3) ADAPTER FILL-IN**

|                                             | <i>Volume per sample</i> | <i>Final concentration</i> |
|---------------------------------------------|--------------------------|----------------------------|
| H <sub>2</sub> O                            | 14.1 µl                  |                            |
| Isothermal Amp. buffer 10x                  | 4 µl                     | 1x                         |
| dNTPs (25 mM each)                          | 0.4 µl                   | 250 uM each                |
| Bst polymerase 2.0, Large Fragment (8 U/µL) | 1.5 µl                   | 0.4 U/µL                   |
| Adapter-ligated DNA                         | 20 µl                    |                            |
| TOTAL VOLUME                                | 40 µl                    |                            |

462

463

464 After setting up the reaction samples were incubated for 20 min. at 37°C, followed by 20 min. at 80°C  
465 to inactivate the Bst polymerase and cleaned using MinElute spin columns as above. Indexing PCR  
466 was performed for 10 cycles in 125 µl volume using a unique P7 indexing primer for each sample, as  
467 follows:

468

| <i>PCR cocktail</i>                             | <i>Volume per 15 µL DNA</i> | <i>Final concentrations</i> |
|-------------------------------------------------|-----------------------------|-----------------------------|
| H <sub>2</sub> O                                | 84 µL                       |                             |
| Pfu Turbo Cx Hotstart DNA Buffer 10x            | 12.5 µL                     | 1x                          |
| dNTPs (25 mM each)                              | 1.25 µL                     | 250 µM each                 |
| Indexing primer P7 (10 µM)                      | 5 µL                        | 0.4 µM                      |
| Primer IS4 (10 µM)                              | 5 µL                        | 0.4 µM                      |
| Pfu Turbo Cx Hotstart DNA Polymerase (2.5 U/µL) | 2.5 µL                      | 5 U                         |
| Adapter-ligated DNA                             | 15 µL                       |                             |
| <b>TOTAL VOLUME</b>                             | <b>125 µL</b>               |                             |

469 Cycling conditions:

470 *2 min. 95°C, (95°C- 30sec. 59°C- 30sec. 72°C- 1min), 7min. 72°C, hold 8°C*

471

472

473

474 **Data processing**

475 All reads were demultiplexed based on their unique indices using Illumina's bcl2fastq (v2.17.1)  
476 software with defaults settings, allowing for one mismatch per index and only retaining "pass filter"  
477 reads (Illumina Inc.). All unidentified reads, i.e. reads with indices that were not used in our  
478 experiment, were subjected to the same filtering steps, as described below. We removed adapter  
479 sequences using AdapterRemoval V2.1.7 using standard parameters and subsequently merged the  
480 reads, requiring a minimal overlap of 11bp and allowing for a 10% sequencing error rate <sup>(4)</sup>.  
481 Unmerged reads and reads below 29 bp were removed leaving only merged reads with an original  
482 insert size of at least 15 bp (7 bp barcodeP7 + 7 bp barcodeP5 + 15 bp DNA fragment = 29 bp). To  
483 increase certainty, we only retained reads with intact and error-free P5 and P7 barcodes (assessed  
484 using an in-house python script available upon request) and an average quality score of at least 30  
485 using prinseq V0.20.4 <sup>(5)</sup>.

486

487 **Statistical analyses**

488 Statistical analyses were performed in R 2.15.3 <sup>(6)</sup>. Significant global chi-square tests were followed  
489 by a post hoc procedure as implemented in the R package polytomous  
490 (<https://artax.karlin.mff.cuni.cz/r-help/library/polytomous/html/00Index.html>). The minimum value  
491 of the chi-squared test statistic for the given degrees of freedom was used to assess if individual  
492 observed values differ significantly from an overall hypothetical homogeneous distribution. The test  
493 also identified the direction of these differences.

494

#### 495 **Estimating barcode cross-contamination**

496 We estimated the rate of barcode cross-contamination as the fraction of reads containing a P5-P7  
497 barcode pair that was not used during library preparation. There is a small probability that cross-  
498 contaminating changes both the P5 and P7 barcode into another valid barcode pair (e.g. a pair that  
499 was used during library preparation). The chance of this occurring is proportional to the number of  
500 used barcodes and can be estimated as  $((n - 1) \cdot \left(\frac{x}{n-1}\right)^2$ , where  $n$  represents the number of used  
501 barcodes (eight in this study) and  $x$  the estimated average barcode cross contamination). The fraction  
502 of reads with invalid barcode-pairs was 0.0276%, which results in an estimate of  $(8 - 1) \cdot$   
503  $\frac{0.000276}{8-1}^2 \cdot 100\% = 1.09 \cdot 10^{-8} \%$  of undetected cross-contaminated reads.

504

#### 505 **Difference in barcode cross-contamination between samples**

506 The rate of barcode cross-contamination differed significantly by sample (global chi-square test,  
507  $P < 10^{-15}$ ). The implemented posthoc procedure suggested that samples 5 and 7 had significantly more  
508 reads with wrong barcode combinations than expected, whereas all the other samples had  
509 significantly fewer such reads. Among reads with barcode cross contamination we found an  
510 overrepresentation of incorrectly paired barcodes #9 and #14 (Table S2), both of which were used for  
511 sample 7 in the following combinations: P5-#9 with P7-#9 and P5-#14 with P7-#14 (Table 1). Elevated  
512 cross-contamination between these two barcodes during laboratory procedures could explain the  
513 results. However, the observed high rate of wrong barcode pairs (P5-#9 with P7-#14, P5-#14 with P7-  
514 #9, Figure S3) is more likely the result of jumping PCR during the 10 rounds of indexing PCR, as both  
515 fractions of sample 7 were indexed in a pooled reaction. Equal frequency of wrong barcode pairs is  
516 further supporting this notion (Table S2) and can be explained by jumping PCR happening randomly  
517 among the reads. In contrast, it is rather unlikely that all four barcodes would have received equal  
518 amounts of cross-contamination during laboratory procedures.

519

520

- 521 1. Rohland, N. & Reich, D. Cost-effective, high-throughput DNA sequencing libraries for  
522 multiplexed target capture. *Genome Res.* **22**, 939–946 (2012).
- 523 2. Rohland, N., Harney, E., Mallick, S., Nordenfelt, S. & Reich, D. Partial uracil-DNA-glycosylase  
524 treatment for screening of ancient DNA. *Philos. Trans. R. Soc. Lond. B. Biol. Sci.* **370**, 20130624  
525 (2015).
- 526 3. Briggs, A. W. *et al.* Removal of deaminated cytosines and detection of in vivo methylation in  
527 ancient DNA. *Nucleic Acids Res.* **38**, e87 (2010).
- 528 4. Schubert, M., Lindgreen, S. & Orlando, L. AdapterRemoval v2: rapid adapter trimming,  
529 identification, and read merging. *BMC Res. Notes* **9**, 88 (2016).
- 530 5. Schmieder, R. & Edwards, R. Quality control and preprocessing of metagenomic datasets.  
531 *Bioinformatics* **27**, 863–864 (2011).
- 532 6. Team R Core. R: A language and environment for statistical computing. R Foundation for  
533 Statistical Computing, Vienna, Austria. ISBN 3-900051-07-0, URL <http://www.R-project.org/>.  
534 (2016).
- 535
- 536

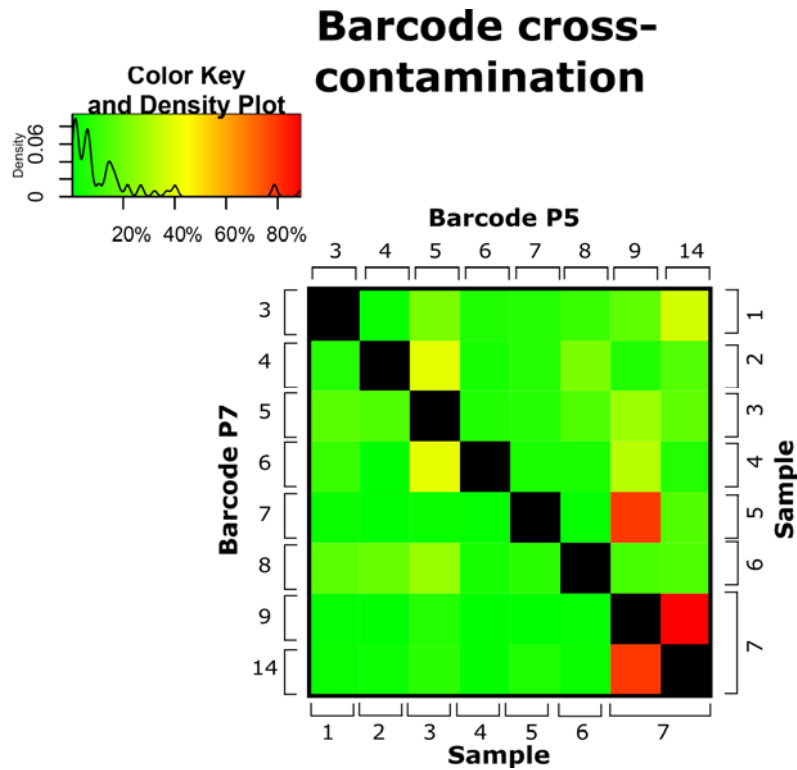

537

538 *Figure S1: Proportion of a given wrong barcode pair in the data out of all cross-contaminated barcode*  
539 *pairs. Note that the overall rate of barcode cross-contamination is only 0.0276% (Table 1) Barcodes 9*  
540 *and 14 are paired significantly more often due to the formation of chimeric reads during pooled*  
541 *amplification of two fractions of sample 7 (see methods).*

542



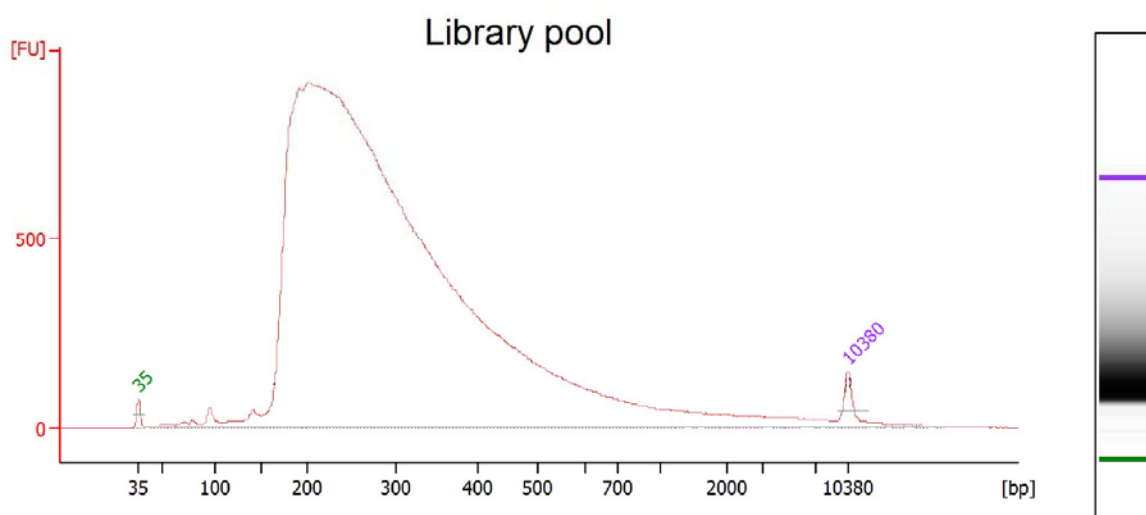

543

544 *Figure S2: Bioanalyzer profile of the final pooled library. Note that during library preparation,*  
545 *sequencing adapters are attached to the DNA fragments, adding an additional 136 bp to the original*  
546 *DNA fragments. The insert size of the DNA is therefore 136 bp lower than what the Bioanalyzer*  
547 *shows.*

548

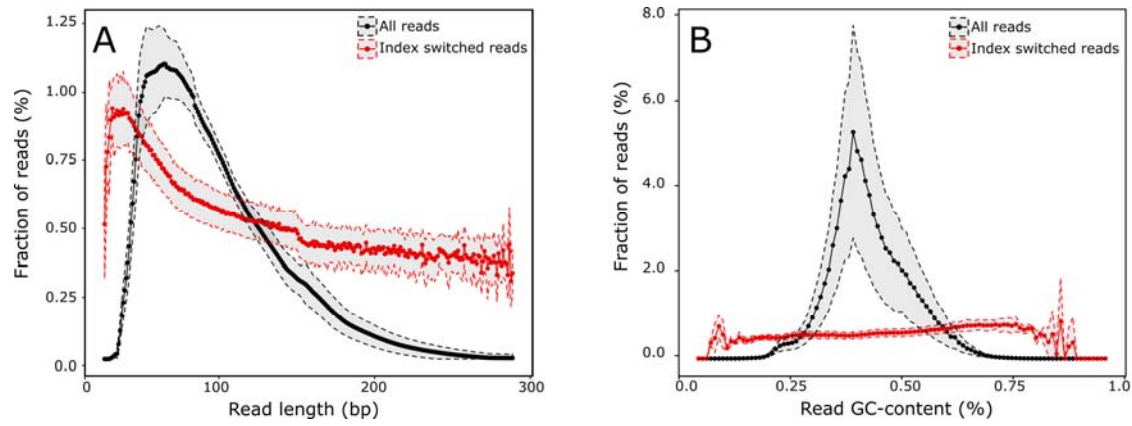

549

550 *Figure S3: A) Read length distribution and the proportion of index hopping by read length. B) Read*  
551 *GC-content distribution and the proportion of index hopping by read GC content. Shaded area depicts*  
552 *95% confidence interval.*

553

554

555

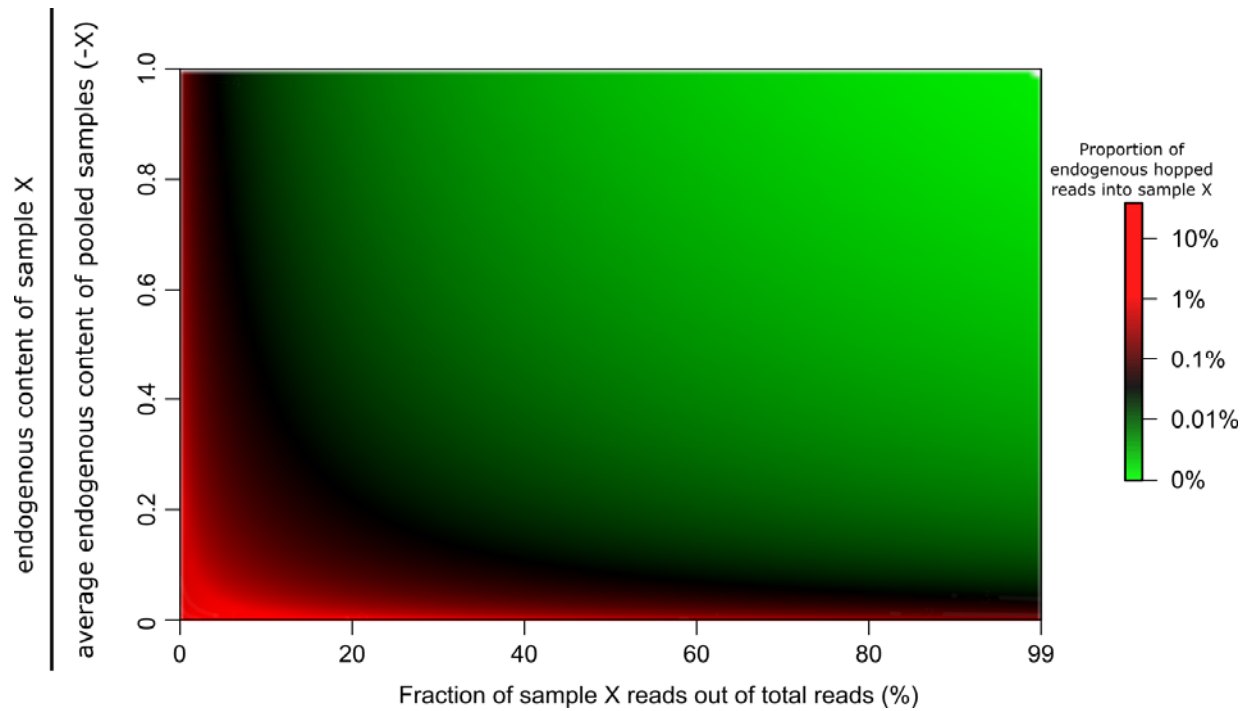

556

557 *Figure S4. Theoretical relationship between endogenous content, fraction of total reads contributed*  
558 *by a given sample (referred to as sample X) to the pooled sequencing library, and index hopping. The*  
559 *lower the proportion of reads coming from sample X and the lower its endogenous content compared*  
560 *to other samples in the pooled sequencing library, the higher the proportion of endogenous hopped*  
561 *reads that sample X will receive from other samples.*

562

563

564
